# Supplementary material
Source: PubMed Central journal article supplement (PMC4772594)
Supplement: JB.00373-15_zjb999093966so1.pdf [file JB.00373-15_zjb999093966so1.pdf]

## **SUPPLEMENTARY INFORMATION (SI)**

**For**

The manuscript of “Succinic Semialdehyde Promotes Pro-survival capability of *Agrobacterium tumefaciens* A6” by *Chao Wang et al.*

Fig. S1

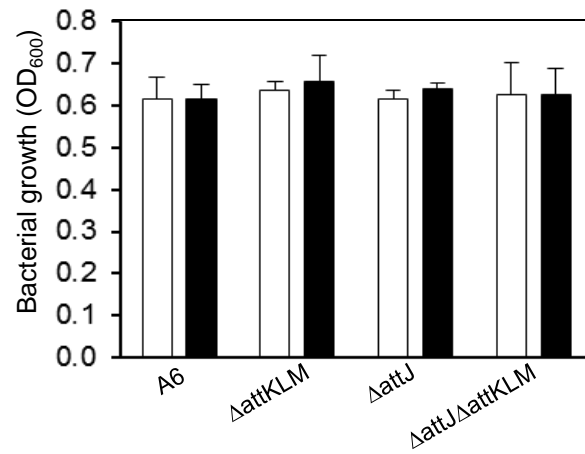

Supplementary Figure S1. Growth of *A. tumefaciens* A6 and related mutants using  $(\text{NH}_4)_2\text{SO}_4$  as sole nitrogen source with (filled) and without (open) SSA.

Fig. S2

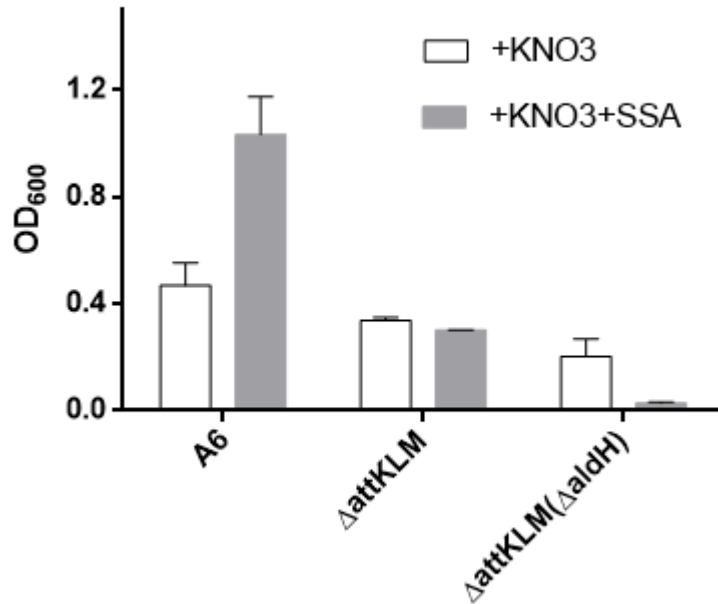

Supplementary Figure S2. Growth of *A. tumefaciens* A6 and related mutants using KNO<sub>3</sub> as sole nitrogen source with (filled) and without (open) SSA.

Fig. S3

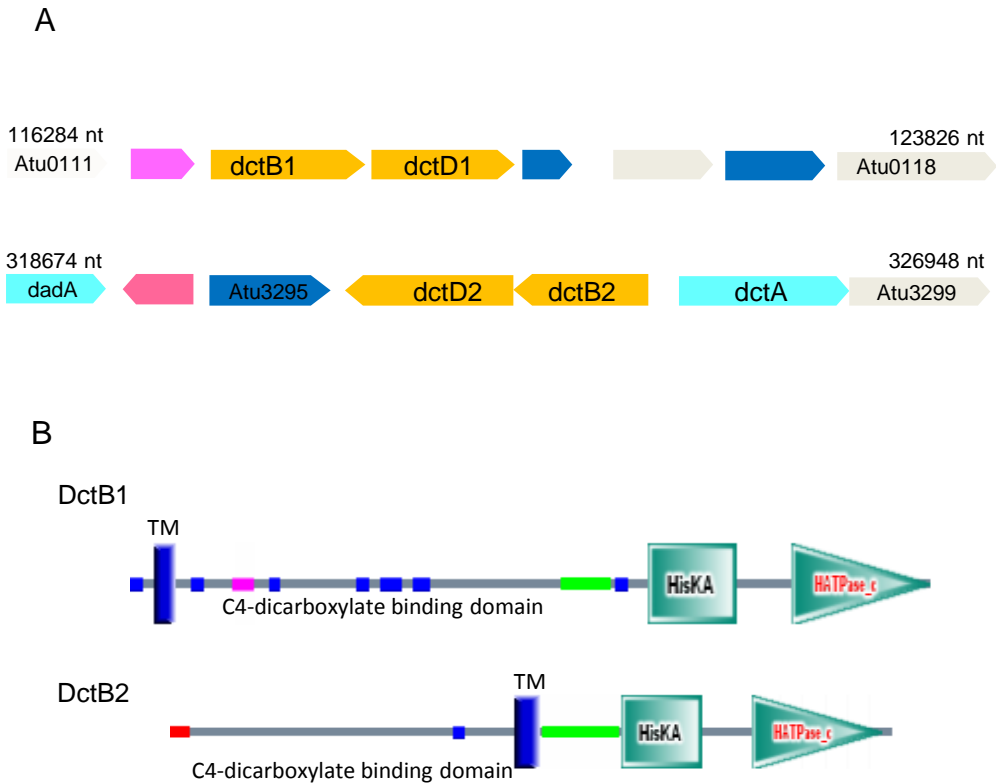

Supplementary Figure S3. Sequence analyses of two-component system DctB/D in *A. tumefaciens*. **(A)** Genetic localization of two copies of DctB/D. DctB: two component sensor kinase for C4-dicarboxylate transport; DctD: two component response regulator for C4-dicarboxylate transport, which is the activator of *rpoN*-dependent promoter. **(B)** Domain analyses of DctB ; the c4-dicarboxylate binding domain and the transmembrane domain are respectively illustrated.

Fig. S4

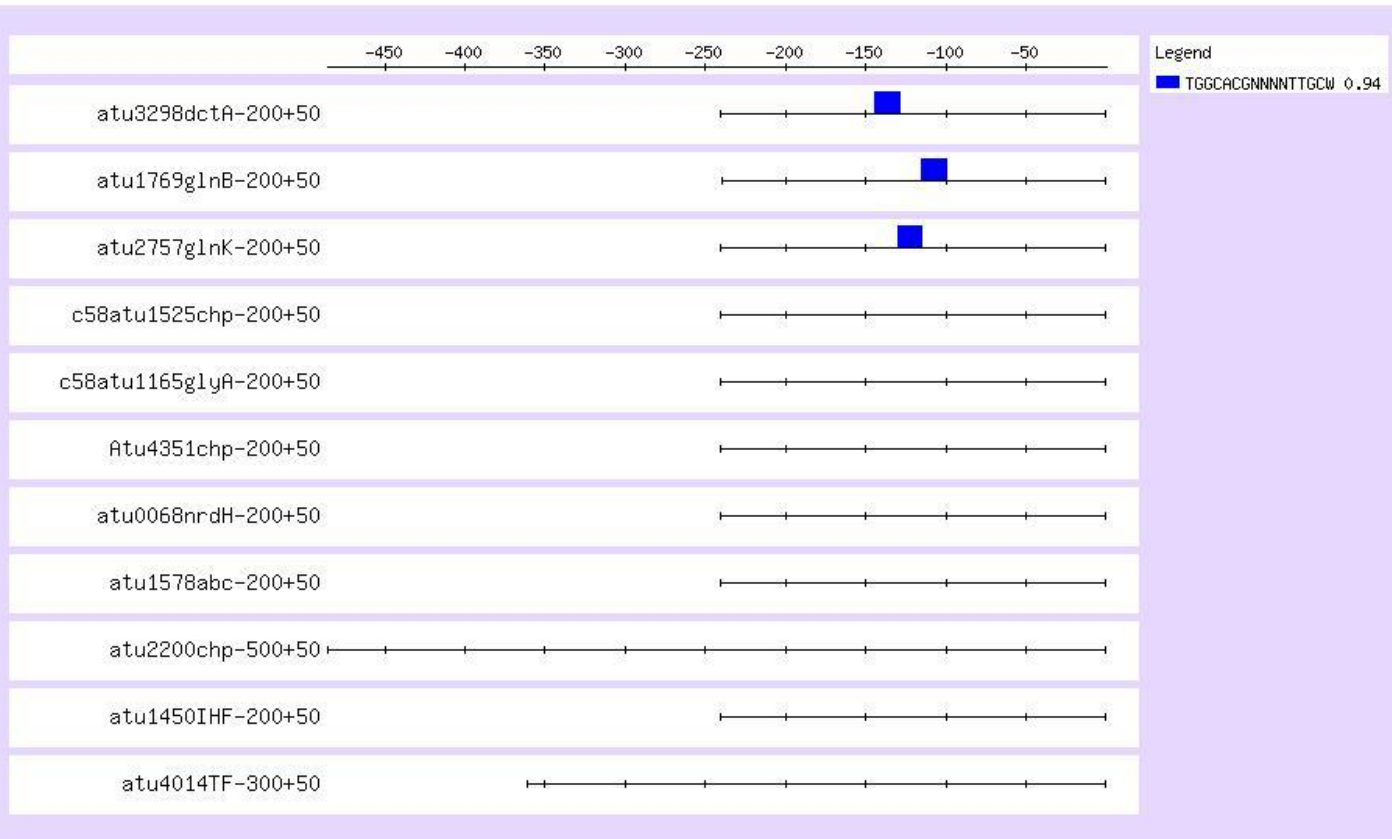

Supplementary Figure S4. Promoter analyses of genes upregulated by SSA and identification of rpoN-dependent promoter in *glnK*, *glnB* and *dctA*.

Fig. S5

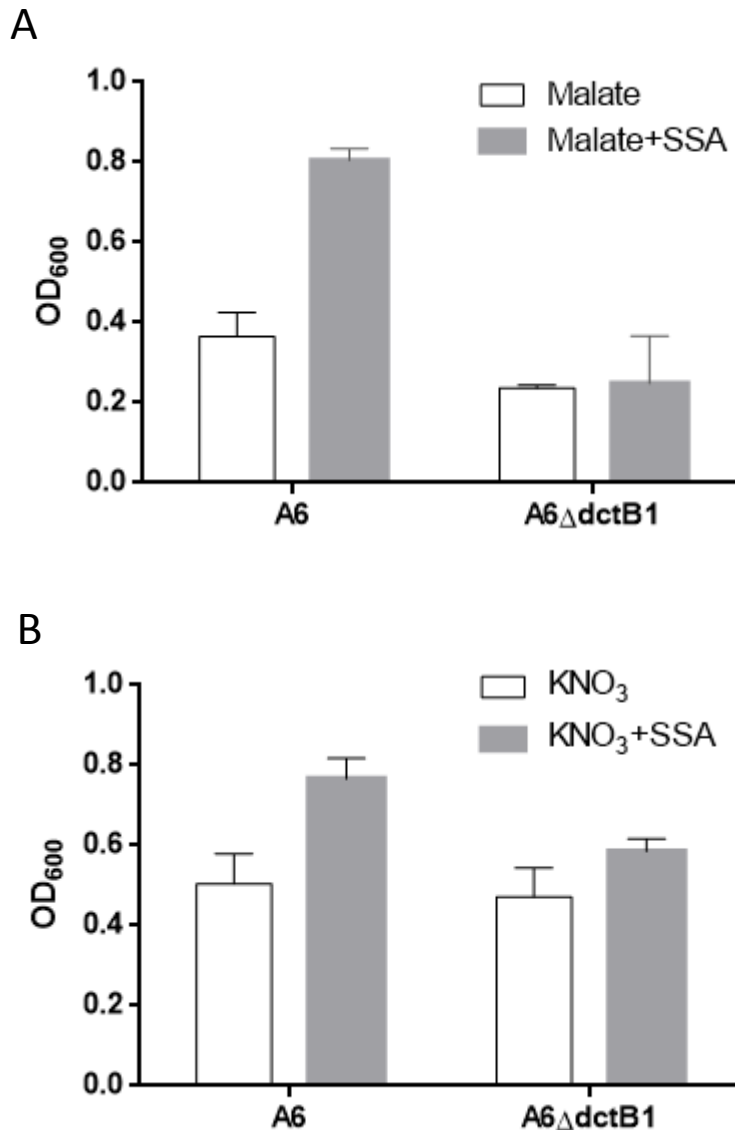

Supplementary Figure S5. Growth of *A. tumefaciens* A6 and its *dctB1* mutant using (A) malate as sole carbon source and (B) KNO<sub>3</sub> as sole nitrogen source with (filled) and without (open) SSA.

**Table S1.** Bacterial strains and plasmids used in this study

| Strain & plasmid              | Relevant characteristics <sup>a</sup>                                                                                                      | Sources or references |
|-------------------------------|--------------------------------------------------------------------------------------------------------------------------------------------|-----------------------|
| <b><i>A. tumefaciens</i></b>  |                                                                                                                                            |                       |
| C58                           | Wild type nopaline strain of <i>A. tumefaciens</i>                                                                                         | S. Q. Pan             |
| A6                            | Wild type octopine strain of <i>A. tumefaciens</i>                                                                                         | A. Kerr               |
| A6( $\Delta$ <i>dctA</i> )    | A6 carrying a in-frame deletion of <i>dctA</i>                                                                                             | This study            |
| A6( $\Delta$ <i>dctB1</i> )   | A6 carrying a in-frame deletion of <i>dctB1</i>                                                                                            | This study            |
| $\Delta$ attJ                 | A6 with the <i>attJ</i> gene transcriptionally fused with Tn3HoHo1- <i>lacZ</i> , same as A6( <i>attJ::lacZ</i> ), Ampr                    | (1)                   |
| $\Delta$ attKLM               | A6 with the <i>attKLM</i> operon transcriptionally fused with Tn3HoHo1- <i>lacZ</i> , same as A6( <i>attKLM::lacZ</i> ), Ampr              | (2)                   |
| $\Delta$ attJ $\Delta$ attKLM | $\Delta$ attKLM with mutation of <i>attJ</i> by <i>Tn5</i> transposon                                                                      | This study            |
| $\Delta$ attKLM $\Delta$ aldH | $\Delta$ attKLM with in frame deletion of the <i>aldH</i> gene, same as A6( <i>attKLM::lacZ</i> , $\Delta$ <i>aldH</i> ), Amp <sup>r</sup> | (3)                   |
| <b><i>E. coli</i></b>         |                                                                                                                                            |                       |
| DH5 $\alpha$                  | supE44 $\Delta$ lacU169( $\Phi$ 80lacZ $\Delta$ M15) hsdR17 $\lambda$ . <i>pir</i> recA1 endA1 gyrA96 thi-1 relA1                          | Laboratory collection |
| S17-1                         | pro res- mod+ integrated copy of RP4, mob+                                                                                                 | A. Kerr               |
| <b>Plasmids</b>               |                                                                                                                                            |                       |
| pK18mobsacB                   | Mobilization and counter selection vector, oriT (RP4) <i>lacZ</i> $\alpha$ , <i>sacB</i> , Suc <sup>r</sup>                                | (4)                   |
| pK18- $\Delta$ <i>dctB1</i>   | pK18mobsacB containing part of <i>dctB1</i> and its flanking region for <i>dctB1</i> in-frame deletion, Kan <sup>r</sup>                   | This study            |
| pK18- $\Delta$ <i>dctA</i>    | pK18mobsacB containing part of <i>dctA</i> and its flanking region for <i>dctA</i> in-frame deletion, Kan <sup>r</sup>                     | This study            |
| pLAFR3                        | IncP, broad host range cosmid vector, Tc <sup>r</sup>                                                                                      | (5)                   |
| pLA- <i>aldH</i>              | pLAFR3 harbouring the encoding region of <i>aldH</i> , Tc <sup>r</sup>                                                                     | Wang et al, (2006)    |

| Strain & plasmid | Relevant characteristics <sup>a</sup>                                  | Sources or references |
|------------------|------------------------------------------------------------------------|-----------------------|
| pLA- <i>attK</i> | pLAFR3 harbouring the encoding region of <i>attK</i> , Tc <sup>r</sup> | Wang et al, (2006)    |
| pLA- <i>attL</i> | pLAFR3 harbouring the encoding region of <i>attL</i> , Tc <sup>r</sup> | Wang et al, (2006)    |
| pLA- <i>attM</i> | pLAFR3 harbouring the encoding region of <i>attM</i> , Tc <sup>r</sup> | Wang et al, (2006)    |

<sup>a</sup>Suc<sup>r</sup>, sucrose resistant; Kan<sup>r</sup>, kanamycin resistant; Amp<sup>r</sup>, ampicillin resistant; Tc<sup>r</sup>, tetracycline resistant.

#### Reference

1. **Wang C, Yan C, Gao YG, Zhang LH.** 2015. D101 is critical for the function of AttJ, a repressor of quorum quenching system in *Agrobacterium tumefaciens*. *J Microbiol* **53**:623-632.
2. **Zhang HB, Wang C, Zhang LH.** 2004. The quorumone degradation system of *Agrobacterium tumefaciens* is regulated by starvation signal and stress alarmone (p)ppGpp. *Mol Microbiol* **52**:1389-1401.
3. **Wang C, Zhang HB, Wang LH, Zhang LH.** 2006. Succinic semialdehyde couples stress response to quorum-sensing signal decay in *Agrobacterium tumefaciens*. *Mol Microbiol* **62**:45-56.
4. **Schafer A, Tauch A, Jager W, Kalinowski J, Thierbach G, Puhler A.** 1994. Small mobilizable multi-purpose cloning vectors derived from the *Escherichia coli* plasmids pK18 and pK19: selection of defined deletions in the chromosome of *Corynebacterium glutamicum*. *Gene* **145**:69-73.
5. **Staskawicz B, Dahlbeck D, Keen N, Napoli C.** 1987. Molecular characterization of cloned avirulence genes from race 0 and race 1 of *Pseudomonas syringae* pv. *glycinea*. *J Bacteriol* **169**:5789-5794.



**Tab. S2** ORFs up-regulated by SSA ( $\geq 2$  fold)

| ORF <sup>b</sup>                                                | Gene | fold <sup>a</sup> | Description                                        |
|-----------------------------------------------------------------|------|-------------------|----------------------------------------------------|
| <b>Amino acid biosynthesis/metabolism</b>                       |      |                   |                                                    |
| Atu0017                                                         | trpF | 2.1               | N-(5'-phosphoribosyl) anthranilate isomerase       |
| Atu0029                                                         | ahcY | 2.2               | S-adenosylhomocysteine hydrolase                   |
| Atu0312                                                         | cysK | 2.9               | cysteine synthase                                  |
| Atu0380                                                         | argB | 2.5               | acetylglutamate kinase                             |
| Atu0817                                                         | cysD | 3.3               | sulfate adenylate transferase, subunit 2           |
| Atu1165                                                         | glyA | 4.5               | serine hydroxymethyltransferase                    |
| Atu1332                                                         | aroQ | 2.4               | 3-dehydroquinate dehydratase                       |
| Atu1770                                                         | glnA | 7.8               | glutamine synthetase I                             |
| Atu2019                                                         | ilvC | 2.6               | ketol-acid reductoisomerase                        |
| Atu2196                                                         | aatA | 2.3               | aspartate aminotransferase A                       |
| Atu2264                                                         | leuA | 2.1               | 2-isopropylmalate synthase                         |
| Atu2416                                                         | glnA | 5.8               | glutamine synthetase II                            |
| Atu2667                                                         | argG | 2.1               | argininosuccinate synthase                         |
| Atu2698                                                         | tyrA | 2.6               | chorismate mutase                                  |
| Atu2709                                                         | leuC | 2.1               | 3-isopropylmalate dehydratase, large subunit       |
| Atu2791                                                         | leuB | 2.0               | 3-isopropylmalate dehydrogenase                    |
| Atu3612                                                         | hisC | 2.4               | histidinol-phosphate aminotransferase              |
| Atu4110                                                         | sdh  | 2.8               | serine dehydrogenase                               |
| Atu4172                                                         | lysC | 2.1               | aspartate kinase, alpha and beta subunit           |
| <b>Purine, pyrimidine, nucleoside and nucleotide metabolism</b> |      |                   |                                                    |
| Atu0068                                                         | nrdH | 3.2               | glutaredoxin protein                               |
| Atu0069                                                         | nrdI | 3.1               | NrdI protein involved in ribonucleotide reduction  |
| Atu0070                                                         | nrdE | 2.9               | ribonucleoside-diphosphate reductase 2 alpha chain |
| Atu0071                                                         | nrdF | 3.4               | ribonucleoside-diphosphate reductase 2 beta chain  |
| Atu0132                                                         |      | 2.3               | 2-deoxyribose-5-phosphate aldolase                 |
| Atu0135                                                         | upp  | 2.4               | uracil phosphoribosyltransferase                   |
| Atu0314                                                         | dut  | 2.0               | deoxyuridine 5'triphosphate nucleotidohydrolase    |
| Atu1122                                                         | ndk  | 2.3               | nucleoside diphosphate kinase                      |
| Atu1731                                                         | gpt  | 2.1               | xanthine-guanine phosphoribosyltransferase         |
| Atu1850                                                         | purL | 2.1               | phosphoribosylformylglycinamide synthetase II      |
| Atu1926                                                         | adk  | 2.2               | adenylate kinase                                   |
| Atu2170                                                         | carA | 2.6               | carbamoylphosphate synthase small chain            |

|         |      |     |                                        |
|---------|------|-----|----------------------------------------|
| Atu2447 | purA | 2.1 | adenylosuccinate synthetase            |
| Atu3604 | hpt  | 2.2 | hypoxanthine phosphoribosyltransferase |

### **Fatty acid, cofactor and prosthetic group**

|         |      |     |                                                           |
|---------|------|-----|-----------------------------------------------------------|
| Atu0066 | frcK | 2.1 | pantothenate kinase                                       |
| Atu0151 | fabA | 2.8 | D-3-hydroxydecanoyl-(acyl carrier-protein) dehydratase    |
| Atu0757 | fabI | 2.0 | enoyl-(acyl-carrier-protein) reductase [NADH]             |
| Atu1096 | acpP | 2.9 | acyl carrier protein                                      |
| Atu1169 | ribC | 2.3 | riboflavin synthase alpha chain                           |
| Atu1171 | ribH | 2.1 | riboflavin synthase beta chain                            |
| Atu1330 | accC | 2.4 | acetyl-CoA carboxylase, biotin carboxylase                |
| Atu1331 | accB | 2.0 | acetyl-CoA carboxylase, biotin carboxyl carrier protein   |
| Atu1383 | fabZ | 2.1 | (3R)-Hydroxymyristoyl-[acyl carrier protein]- Dehydratase |
| Atu1454 | cysG | 2.7 | siroheme synthase                                         |
| Atu2613 | hemA | 2.2 | 5-aminolevulinate synthase                                |
| Atu2805 |      | 2.4 | cobalamin synthesis related protein                       |
| Atu5122 | fabG | 2.2 | 3-oxoacyl-(acyl-carrier protein) reductase                |

### **Central intermediary metabolism**

|         |      |     |                                                      |
|---------|------|-----|------------------------------------------------------|
| Atu1456 |      | 2.3 | sulfite reductase [NADPH] hemoprotein beta-component |
| Atu1854 | grlA | 2.2 | glutaredoxin-related protein                         |
| Atu2405 | ureB | 2.0 | urease beta subunit                                  |
| Atu2661 | ppa  | 2.4 | inorganic pyrophosphatase                            |
| Atu2751 | fdxA | 2.0 | Ferredoxin                                           |
| Atu5296 |      | 2.6 | arylester hydrolase                                  |
| Atu5297 |      | 2.1 | Hydrolase                                            |

### **Energy metabolism**

|         |      |     |                                 |
|---------|------|-----|---------------------------------|
| Atu0022 | trxA | 2.4 | thioredoxin C-1                 |
| Atu0101 | cycM | 2.2 | cytochrome c                    |
| Atu0404 | pgi  | 2.1 | glucose-6-phosphate isomerase   |
| Atu0599 | pgl  | 2.2 | 6-phosphogluconolactonase       |
| Atu0713 | atpI | 2.0 | ATP synthase, subunit I         |
| Atu0714 | atpA | 2.2 | ATP synthase A chain            |
| Atu0715 | atpC | 2.1 | ATP synthase C chain            |
| Atu0717 |      | 3.1 | ATP synthase B chain            |
| Atu0767 | coxB | 2.2 | cytochrome c oxidase subunit II |

|         |      |     |                                                      |
|---------|------|-----|------------------------------------------------------|
| Atu0775 | thrB | 2.0 | homoserine kinase                                    |
| Atu1256 |      | 2.1 | cytochrome P450 hydroxylase                          |
| Atu1268 | nuoA | 2.5 | NADH ubiquinone oxidoreductase chain A               |
| Atu1269 | nuoB | 2.2 | NADH ubiquinone oxidoreductase chain B               |
| Atu1270 | nuoC | 3.1 | NADH ubiquinone oxidoreductase chain C               |
| Atu1274 | nuoE | 2.1 | NADH ubiquinone oxidoreductase chain E               |
| Atu1275 | nuoF | 2.1 | NADH ubiquinone oxidoreductase chain F               |
| Atu1277 | nuoH | 2.3 | NADH ubiquinone oxidoreductase I chain H             |
| Atu1278 | nuoI | 2.4 | NADH ubiquinone oxidoreductase chain I               |
| Atu1279 | nuoJ | 2.4 | NADH ubiquinone oxidoreductase chain J               |
| Atu1281 | nuoL | 2.7 | NADH ubiquinone oxidoreductase chain L               |
| Atu1283 | nuoN | 2.3 | NADH ubiquinone oxidoreductase chain N               |
| Atu1392 | cisY | 2.1 | citrate synthase                                     |
| Atu1426 | eno  | 2.2 | enolase                                              |
| Atu1429 | pdhA | 2.5 | pyruvate dehydrogenase alpha subunit                 |
| Atu1430 |      | 2.5 | pyruvate dehydrogenase beta subunit                  |
| Atu1458 | mvrA | 2.3 | ferredoxin NADP+ reductase                           |
| Atu1463 | gcvH | 2.0 | glycine cleavage system component H                  |
| Atu1613 | rpiA | 2.0 | ribose 5-phosphate isomerase                         |
| Atu2237 | fbcC | 2.0 | cytochrome c1                                        |
| Atu2239 | fbcF | 2.1 | ubiquinol-cytochrome C reductase iron-sulfur subunit |
| Atu2621 | atpC | 2.3 | ATP synthase epsilon chain                           |
| Atu2623 | atpG | 2.2 | ATP synthase gamma chain                             |
| Atu2624 | atpA | 2.5 | ATP synthase alpha chain                             |
| Atu2625 | atpH | 2.5 | ATP Synthase delta chain                             |
| Atu2637 | sucD | 2.2 | succinyl-CoA synthetase alpha chain                  |
| Atu2638 | sucC | 2.5 | succinyl-CoA synthetase beta chain                   |
| Atu2645 | sdhC | 2.3 | succinate dehydrogenase cytochrome B-556 subunit     |
| Atu2685 | acnA | 2.1 | aconitate hydratase                                  |
| Atu3737 | gapA | 2.2 | Glyceraldehyde 3-Phosphate Dehydrogenase             |
| Atu3778 | galU | 3.0 | UTP-glucose-1-phosphate uridylyltransferase          |
| Atu4405 | napE | 5.2 | periplasmic nitrate reductase protein NapE           |
| Atu4406 | napF | 2.2 | periplasmic nitrate reductase protein NapF           |
| Atu4407 | napD | 3.2 | periplasmic nitrate reductase protein NapD           |
| Atu4408 | napA | 3.0 | periplasmic nitrate reductase protein NapA           |
| Atu4409 | napB | 4.1 | periplasmic nitrate reductase small subunit          |
| Atu4410 | napC | 2.1 | periplasmic nitrate reductase small subunit          |

|         |      |     |                       |
|---------|------|-----|-----------------------|
| Atu4464 | talB | 2.8 | transaldolase         |
| Atu4734 | acnB | 2.1 | aconitate hydratase 2 |

### Transport & binding protein

|         |      |     |                                                                      |
|---------|------|-----|----------------------------------------------------------------------|
| Atu0030 | ptsH | 2.2 | phosphocarrier protein HPr                                           |
| Atu0031 |      | 2.4 | PTS system, IIA component                                            |
| Atu0063 | frcB | 2.3 | ABC transporter, substrate binding protein [sugar]                   |
| Atu0064 | frcC | 2.1 | ABC transporter, membrane spanning protein [sugar]                   |
| Atu0065 | frcA | 2.6 | ABC transporter, nucleotide binding/ATPase protein [sugar]           |
| Atu0188 |      | 2.0 | ABC transporter, membrane spanning protein [peptide]                 |
| Atu0249 |      | 2.2 | ABC transporter, substrate binding protein [sugar]                   |
| Atu0330 | ptsN | 2.2 | nitrogen regulatory IIA protein                                      |
| Atu0528 | mscL | 2.0 | large conductance mechanosensitive channel proteins                  |
| Atu0820 |      | 2.4 | ABC transporter, substrate binding protein [sulfate]                 |
| Atu0895 |      | 3.5 | ABC transporter, substrate binding protein                           |
| Atu1021 |      | 2.0 | outer membrane protein                                               |
| Atu1577 |      | 3.1 | ABC transporter, substrate binding protein [amino acid]              |
| Atu1578 |      | 3.7 | ABC transporter, membrane spanning protein [amino acid]              |
| Atu1579 |      | 3.0 | ABC transporter, membrane spanning protein [amino acid]              |
| Atu1580 |      | 4.3 | ABC transporter, nucleotide binding/ATPase protein [amino acid]      |
| Atu1879 |      | 2.3 | ABC transporter, substrate binding protein [amino acid]              |
| Atu2276 | braC | 2.2 | ABC transporter, substrate binding protein [amino acid]              |
| Atu2281 |      | 2.0 | ABC transporter, substrate binding protein [proline/glycine betaine] |
| Atu2347 | gguA | 2.1 | ABC transporter, nucleotide binding/ATPase protein [sugar]           |
| Atu2348 | chvE | 3.1 | sugar binding protein                                                |
| Atu2365 |      | 2.7 | ABC transporter, substrate binding protein [amino acid]              |
| Atu2422 |      | 2.6 | ABC transporter, substrate binding protein [amino acid]              |
| Atu2492 | mtbA | 2.2 | MFS permease [sugar]                                                 |
| Atu2561 | modA | 2.3 | ABC transporter, substrate binding protein [molybdate]               |
| Atu2758 | amtB | 4.8 | ammonium transporter                                                 |
| Atu2771 | bfr  | 3.3 | bacterioferritin                                                     |
| Atu3170 |      | 2.0 | ABC transporter, nucleotide binding/ATPase protein                   |
| Atu3298 | dctA | 5.8 | C4-dicarboxylate transport protein                                   |
| Atu3357 |      | 3.1 | ABC transporter, substrate binding protein [amino acid]              |
| Atu3368 |      | 2.7 | periplasmic mannitol-binding protein                                 |

|         |  |     |                                                                   |
|---------|--|-----|-------------------------------------------------------------------|
| Atu3396 |  | 2.2 | ABC transporter, substrate binding protein [iron]                 |
| Atu3504 |  | 3.5 | ABC transporter, substrate binding protein [sulfate]              |
| Atu4033 |  | 2.6 | ABC transporter, substrate binding protein [sugar]                |
| Atu4431 |  | 3.6 | ABC transporter, substrate binding protein [oligopeptide]         |
| Atu4447 |  | 2.0 | ABC transporter, substrate binding protein [sorbitol]             |
| Atu4448 |  | 2.9 | ABC transporter, membrane spanning protein                        |
| Atu4449 |  | 2.1 | ABC transporter, membrane spanning protein<br>[sorbitol/mannitol] |
| Atu4488 |  | 2.0 | ABC transporter, membrane spanning protein                        |
| Atu4525 |  | 2.3 | ABC transporter, substrate binding protein [oligopeptide]         |
| Atu4600 |  | 2.3 | ABC transporter, nucleotide binding/ATPase protein                |

### DNA/chromosome metabolism

|         |      |     |                                       |
|---------|------|-----|---------------------------------------|
| Atu0338 | ihfB | 2.1 | integration host factor, beta subunit |
| Atu1262 |      | 2.6 | DNA-binding protein                   |
| Atu1359 | dksA | 2.1 | dnaK deletion suppressor protein      |
| Atu1512 | ssb  | 2.9 | single-strand DNA binding protein     |

### Transcription

|         |      |     |                                            |
|---------|------|-----|--------------------------------------------|
| Atu0331 |      | 3.3 | sigma-54 modulation protein                |
| Atu0385 | rnpA | 2.1 | ribonuclease P protein component           |
| Atu1029 | rnpO | 2.6 | DNA-directed RNA polymerase omega subunit  |
| Atu1339 | rne  | 2.5 | ribonuclease E                             |
| Atu1923 | rpoA | 2.0 | DNA-directed RNA polymerase alpha subunit  |
| Atu1956 | rpoB | 2.6 | DNA-directed RNA polymerase beta chain     |
| Atu1961 | nusG | 2.2 | transcription antitermination protein NusG |
| Atu2182 | greA | 2.5 | transcription elongation facto             |
| Atu2700 | rimM | 2.3 | 16S rRNA processing protein                |
| Atu2833 | rho  | 2.6 | transcription termination factor Rho       |

### Translation

|         |      |     |                                             |
|---------|------|-----|---------------------------------------------|
| Atu0084 | rpsO | 2.2 | 30S ribosomal protein S15                   |
| Atu0112 | rpmF | 2.1 | 50S ribosomal protein L32                   |
| Atu0254 | infC | 3.3 | translation initiation factor 3             |
| Atu0255 | rpmI | 2.6 | 50S ribosomal protein L35                   |
| Atu0256 | rplT | 2.4 | 50S ribosomal protein L20                   |
| Atu0258 | pheS | 2.2 | phenylalanyl-tRNA synthetase, alpha-subunit |

|         |      |     |                                                  |
|---------|------|-----|--------------------------------------------------|
| Atu0323 | rpsT | 2.3 | 30S ribosomal protein S20                        |
| Atu0534 | infA | 3.1 | translation initiation factor IF-1               |
| Atu0676 | hisS | 2.1 | histidyl-tRNA synthetase                         |
| Atu0689 | rluB | 2.3 | ribosomal large subunit pseudouridine synthase B |
| Atu0786 |      | 2.1 | peptidase, family M16                            |
| Atu0977 | dop  | 3.0 | serine protease DO-like protease                 |
| Atu1258 | clpP | 2.0 | ATP-dependent Clp protease, proteolytic subunit  |
| Atu1259 | clpX | 2.0 | ATP-dependent Clp protease, ATP-binding subunit  |
| Atu1261 | lon  | 2.6 | ATP-dependent protease LA                        |
| Atu1288 | proS | 2.1 | prolyl-tRNA synthetase                           |
| Atu1299 | rpmG | 2.5 | 50S ribosomal protein L33                        |
| Atu1318 | gatC | 3.9 | glutamyl-tRNA-Gln-amidotransferase chain C       |
| Atu1375 | tsf  | 2.1 | translation elongation factor Ts                 |
| Atu1377 | rff  | 2.7 | ribosome recycling factor                        |
| Atu1680 | ppiB | 2.2 | peptidyl prolyl cis-trans isomerase              |
| Atu1686 | ppiD | 2.2 | peptidyl-prolyl cis-trans isomerase D            |
| Atu1924 | rpsK | 2.5 | 30S ribosomal protein S11                        |
| Atu1925 | rpsM | 2.7 | 30S ribosomal protein S13                        |
| Atu1928 | rplO | 2.6 | 50S ribosomal protein L15                        |
| Atu1930 | rplR | 2.5 | 50S ribosomal protein L18                        |
| Atu1931 | rplF | 2.7 | 50S ribosomal protein L6                         |
| Atu1932 | rpsH | 2.5 | 30S ribosomal protein S8                         |
| Atu1933 | rpsN | 2.3 | 30S ribosomal protein S14                        |
| Atu1934 | rplE | 2.0 | 50S ribosomal protein L5                         |
| Atu1935 | rplX | 3.5 | 50S ribosomal protein L24                        |
| Atu1936 | rplN | 3.7 | 50S ribosomal protein L14                        |
| Atu1937 | rpsQ | 2.4 | 30S ribosomal protein S17                        |
| Atu1938 | rplL | 2.3 | 50S ribosomal protein L29                        |
| Atu1939 | rplP | 2.3 | 50S ribosomal protein L16                        |
| Atu1941 | rplV | 2.5 | 50S ribosomal protein L22                        |
| Atu1942 | rpsS | 2.2 | 30S ribosomal protein S19                        |
| Atu1944 | rplW | 2.7 | 50S ribosomal protein L23                        |
| Atu1946 | rplC | 2.3 | 50S ribosomal protein L3                         |
| Atu1947 | rpsJ | 2.2 | 30S ribosomal protein S10                        |
| Atu1948 | tuf  | 2.4 | elongation factor TU                             |
| Atu1949 | fusA | 2.3 | translation elongation factor G                  |
| Atu1950 | rpsG | 2.0 | 30S ribosomal protein S7                         |

|         |      |     |                                                 |
|---------|------|-----|-------------------------------------------------|
| Atu1958 | rplJ | 2.2 | 50S ribosomal Protein L10                       |
| Atu1959 | rplA | 2.2 | 50S ribosomal protein L1                        |
| Atu1966 | tuf  | 2.2 | elongation factor TU                            |
| Atu2044 | hflC | 2.4 | HFLC protein                                    |
| Atu2227 | rplY | 2.2 | 50S ribosomal protein L25                       |
| Atu2270 | clpP | 2.5 | ATP-dependent Clp protease, proteolytic subunit |
| Atu2699 | rpsP | 2.0 | 30S ribosomal protein S16                       |
| Atu2784 | rpmA | 2.2 | 50S ribosomal protein L27                       |
| Atu2785 | rplU | 2.1 | 50S ribosomal protein L21                       |
| Atu3519 | ppiD | 3.1 | peptidyl-prolyl cis-trans isomerase             |
| Atu3617 | rpmB | 2.1 | 50S ribosomal protein L28                       |
| Atu3637 | rpsU | 2.1 | 30S ribosomal protein S21                       |
| Atu3743 |      | 2.0 | 50S ribosomal protein L31                       |
| Atu4064 | rpsU | 2.1 | 30S ribosomal protein S21                       |

#### **Regulator and two-component signaling**

|         |      |     |                                        |
|---------|------|-----|----------------------------------------|
| Atu0062 | frcR | 2.4 | transcriptional regulator, ROK family  |
| Atu0465 |      | 2.5 | transcriptional regulator              |
| Atu0484 |      | 2.0 | two component response regulator       |
| Atu0524 | luxR | 2.2 | transcriptional regulator, LuxR family |
| Atu0573 |      | 2.0 | transcriptional regulator              |
| Atu0978 | ragA | 2.3 | two component response regulator       |
| Atu1450 | hfq  | 3.5 | host factor I                          |
| Atu1769 | glnB | 8.4 | nitrogen regulatory protein PII        |
| Atu1985 |      | 2.4 | two component response regulator       |
| Atu2020 |      | 2.3 | transcriptional regulator, TetR family |
| Atu2278 | noIR | 2.8 | transcriptional regulator, ArsR family |
| Atu2434 | ctrA | 2.4 | two component response regulator       |
| Atu2757 | glnK | 9.6 | nitrogen regulatory protein PII        |
| Atu2765 |      | 2.5 | transcriptional regulator, CarD family |
| Atu3572 |      | 2.4 | transcriptional regulator, HTH family  |
| Atu3883 |      | 3.3 | chemotaxis response regulator          |
| Atu4014 |      | 3.7 | transcriptional regulator              |

#### **Cell envelope**

|         |      |     |                                            |
|---------|------|-----|--------------------------------------------|
| Atu0126 |      | 2.4 | membrane lipoprotein                       |
| Atu0224 | ctpA | 2.4 | components of type IV pilus, pilin subunit |

|         |      |     |                                                |
|---------|------|-----|------------------------------------------------|
| Atu1131 | ropB | 2.6 | outer membrane protein                         |
| Atu1381 | omp1 | 2.2 | group 1 outer membrane protein precursor       |
| Atu1500 | rlpA | 2.0 | rare lipoprotein A                             |
| Atu1789 |      | 2.4 | lipoprotein                                    |
| Atu2100 |      | 2.1 | penicillin binding protein 2                   |
| Atu3708 |      | 2.2 | outer surface protein                          |
| Atu4061 | exoX | 2.4 | exopolysaccharide production repressor protein |
| Atu4489 |      | 2.2 | outer membrane lipoprotein                     |
| Atu4610 |      | 2.6 | sugar nucleotide epimerase/dehydratase         |
| Atu4612 | wbnE | 2.4 | glycosyltransferase                            |
| Atu4613 |      | 2.1 | glycosyltransferase                            |
| Atu4617 | rffB | 2.2 | dTDP-D-glucose-4,6-dehydratase                 |
| Atu4618 | rfbC | 2.7 | dTDP-rhamnose-3,5-epimerase                    |

### Cell process

|         |       |     |                                              |
|---------|-------|-----|----------------------------------------------|
| Atu0006 | secB  | 3.6 | protein-export protein SECB                  |
| Atu0542 | fla   | 2.3 | flagellin                                    |
| Atu0553 | fliE  | 2.4 | flagellar hook-basal body complex protein    |
| Atu0562 | fliN  | 3.4 | flagellar motor switch protein FliN          |
| Atu0574 | flgE  | 2.6 | flagellar hook protein                       |
| Atu0575 | flgK  | 2.1 | hook associated protein I homolog            |
| Atu0577 | flaF  | 2.7 | FLAF protein                                 |
| Atu0578 | flbT  | 2.3 | FLBT protein                                 |
| Atu0682 | groEL | 3.0 | 60 KDA chaperonin                            |
| Atu0683 | groES | 2.6 | 10 KD chaperonin (protein CPN10)             |
| Atu0779 | prx   | 2.1 | peroxiredoxin                                |
| Atu0876 | sodF  | 2.5 | superoxide dismutase                         |
| Atu1563 | yajC  | 2.5 | preprotein translocase protein               |
| Atu1664 | tig   | 2.0 | trigger factor                               |
| Atu1706 | tatA  | 2.2 | SEC-independent protein translocase protein  |
| Atu1775 |       | 2.1 | polyketide biosynthesis associated protein   |
| Atu2200 | cspA  | 3.5 | cold shock protein                           |
| Atu2550 | acrA  | 2.0 | acriflavin resistance protein A              |
| Atu2617 | cheW  | 2.0 | chemotaxis protein                           |
| Atu3121 | cspA  | 2.4 | cold shock protein                           |
| Atu3247 | minE  | 2.7 | cell division topological specificity factor |
| Atu3249 | minC  | 2.0 | bacterial septum site-determining protein    |



|         |      |     |                                     |
|---------|------|-----|-------------------------------------|
| Atu3520 | secA | 2.7 | preprotein translocase SECA subunit |
| Atu3732 | tlyC | 2.1 | hemolysin                           |
| Atu4214 | cspA | 2.5 | cold shock protein                  |

**Virulence**

|         |      |      |                                                        |
|---------|------|------|--------------------------------------------------------|
| Atu2553 | chvH | 2.2  | elongation factor P                                    |
| Atu4074 | exoC | 2.3  | phosphoglucomutase                                     |
| Atu5129 | attC | 2.1  | ABC transporter, substrate binding protein [mannopine] |
| Atu5136 | attJ | 3.7  | transcription regulator, lclR family                   |
| Atu5137 | attK | 9.4  | NAD-dependent succinate aldehyde dehydrogenases        |
| Atu5138 | attL | 13.9 | alcohol dehydrogenase                                  |
| Atu5139 | attM | 21.1 | Zn-dependent hydrolases                                |

a. Fold change represents the average ratio of mRNA transcript levels in SSA-treated to untreated *A. tumefaciens*.

b. Open reading frame (ORF) is as annotated in <http://cancer.lbi.ic.unicamp.br/agroC58/>.

**Table S3.** Downregulated genes with SSA treatment ( $\leq -1.5$  fold)

| ORF <sup>b</sup>                       | Gene | Fold <sup>a</sup> | Description                                                       |
|----------------------------------------|------|-------------------|-------------------------------------------------------------------|
| <b>Fatty acid metabolism</b>           |      |                   |                                                                   |
| Atu1974                                | cfa  | -1.7              | cyclopropane-fatty-acyl-phospholipid synthase                     |
| Atu1417                                | fad  | -1.5              | enoyl-CoA hydratase                                               |
| <b>Central metabolism</b>              |      |                   |                                                                   |
| Atu1535                                | FixQ | -2.0              | cytochrome c oxidase, FixQ chain                                  |
| Atu1654                                |      | -1.8              | nitroreductase                                                    |
| <b>Transport &amp; binding protein</b> |      |                   |                                                                   |
| Atu5346                                |      | -1.5              | ABC transporter, membrane spanning protein [oligopeptide]         |
| Atu1398                                |      | -1.5              | ABC transporter, membrane spanning protein [amino acid]           |
| Atu5523                                |      | -1.6              | ABC transporter, membrane spanning protein [amino acid]           |
| Atu3149                                |      | -1.5              | ABC transporter, membrane spanning protein [sugar]                |
| Atu3187                                | ugpE | -1.7              | ABC transporter, membrane spanning protein [glycerol-3-phosphate] |
| Atu1736                                |      | -1.5              | manganese transport protein                                       |
| Atu2390                                |      | -1.5              | ABC transporter, membrane spanning protein                        |
| Atu4785                                | afuB | -1.5              | ABC transporter, membrane spanning protein [iron]                 |
| <b>DNA metabolism</b>                  |      |                   |                                                                   |
| Atu0840                                |      | -1.8              | ATP-dependent DNA ligase                                          |
| <b>Regulator</b>                       |      |                   |                                                                   |
| Atu4644                                |      | -1.5              | transcriptional regulator, AraC family                            |
| <b>Cell process</b>                    |      |                   |                                                                   |
| Atu3887                                | ibpA | -1.6              | small heat shock protein                                          |
| Atu6071                                | attM | -1.8              | Zn-dependent hydrolases                                           |
| <b>Hypothetical protein</b>            |      |                   |                                                                   |
| Atu0117                                |      | -1.5              | hypothetical protein                                              |
| Atu0448                                |      | -1.5              | hypothetical protein                                              |
| Atu0743                                |      | -1.6              | hypothetical protein                                              |
| Atu0868                                |      | -1.5              | hypothetical protein                                              |
| Atu0968                                |      | -1.5              | hypothetical protein                                              |
| Atu1591                                |      | -1.5              | hypothetical protein                                              |
| Atu1886                                |      | -1.5              | hypothetical protein                                              |
| Atu2570                                |      | -1.5              | hypothetical protein                                              |
| Atu3373                                |      | -1.9              | hypothetical protein                                              |
| Atu4016                                |      | -1.6              | hypothetical protein                                              |
| Atu4302                                |      | -1.5              | hypothetical protein                                              |
| Atu4308                                |      | -1.5              | hypothetical protein                                              |
| Atu4353                                |      | -1.5              | hypothetical protein                                              |
| Atu4506                                |      | -1.7              | hypothetical protein                                              |
| Atu5009                                |      | -1.5              | hypothetical protein                                              |
| Atu6137                                |      | -1.5              | hypothetical protein                                              |

a. Fold change represents the average ratio of mRNA transcript levels in SSA-treated strain C58 to untreated strain C58.

b. Open reading frame (ORF) is as annotated in <http://cancer.lbi.ic.unicamp.br/agroC58/>.
